# Supplementary material for: Heritable epigenetic diversity for conservation and utilization of epigenetic germplasm resources of clonal East African Highland banana (EAHB) accessions
Source: PubMed Central journal article supplement (PMC7419381; doi:10.1007/s00122-020-03620-1), 2020-07-27
Supplement: 122_2020_3620_MOESM2_ESM.pdf [file 122_2020_3620_MOESM2_ESM.pdf]

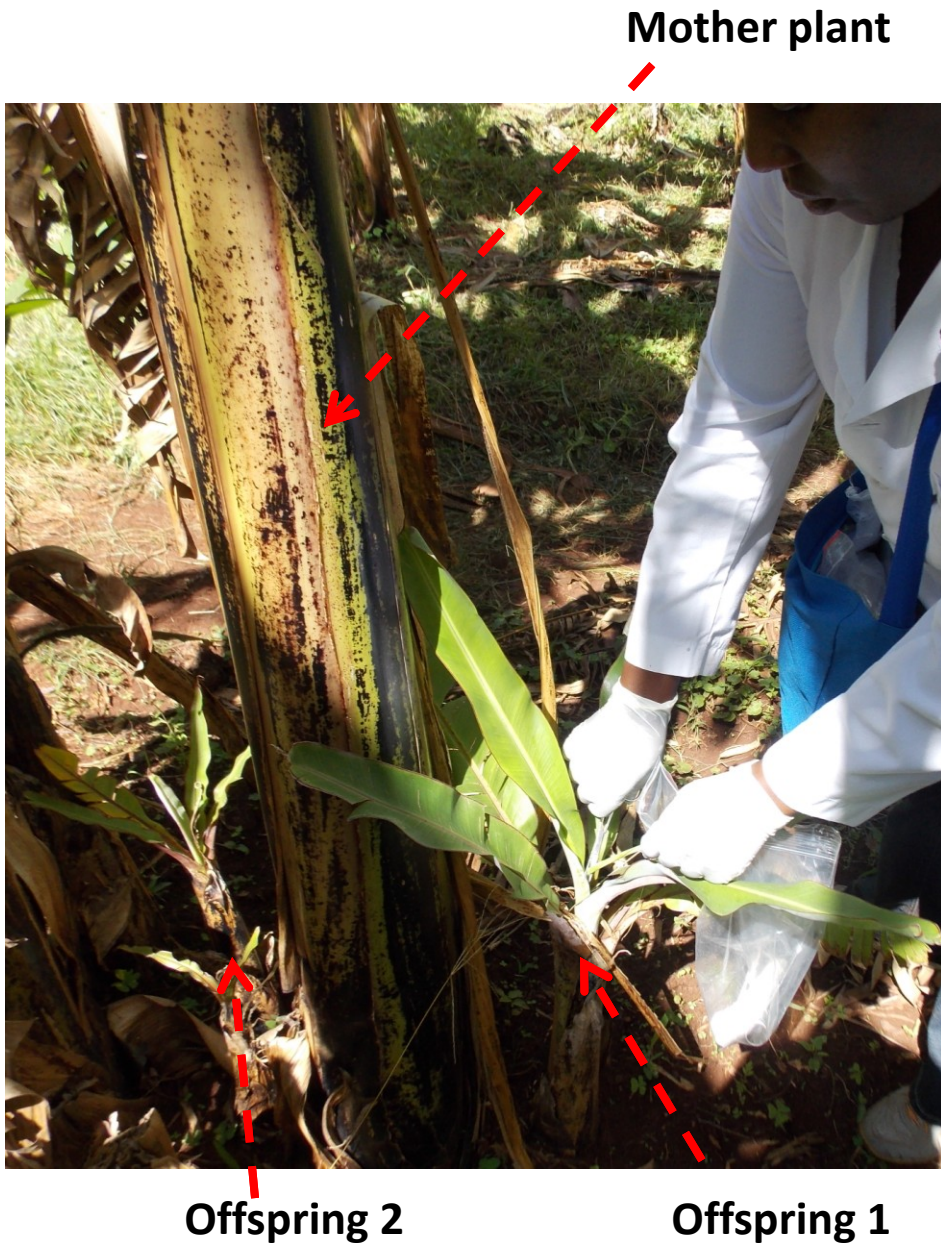

| # | EAHB cultivar | Ploidy | No. of offsprings |
|---|---------------|--------|-------------------|
| 1 | Namunwe       | 3x     | 3                 |
| 2 | Rugondo       | 3x     | 2                 |
| 3 | Enzirabushera | 3x     | 3                 |
| 4 | Nsowe         | 3x     | 2                 |
| 5 | Nakhaki       | 3x     | 4                 |
| 6 | Nante         | 3x     | 2                 |
| 7 | Nalukira      | 3x     | 3                 |
| 8 | Lwefusa       | 3x     | 3                 |
| 9 | Nakibule      | 3x     | 3                 |
