# Supplementary material for: Heritable epigenetic diversity for conservation and utilization of epigenetic germplasm resources of clonal East African Highland banana (EAHB) accessions
Source: PubMed Central journal article supplement (PMC7419381; doi:10.1007/s00122-020-03620-1), 2020-07-27

Section of a cigar  
leaf of the banana  
plant

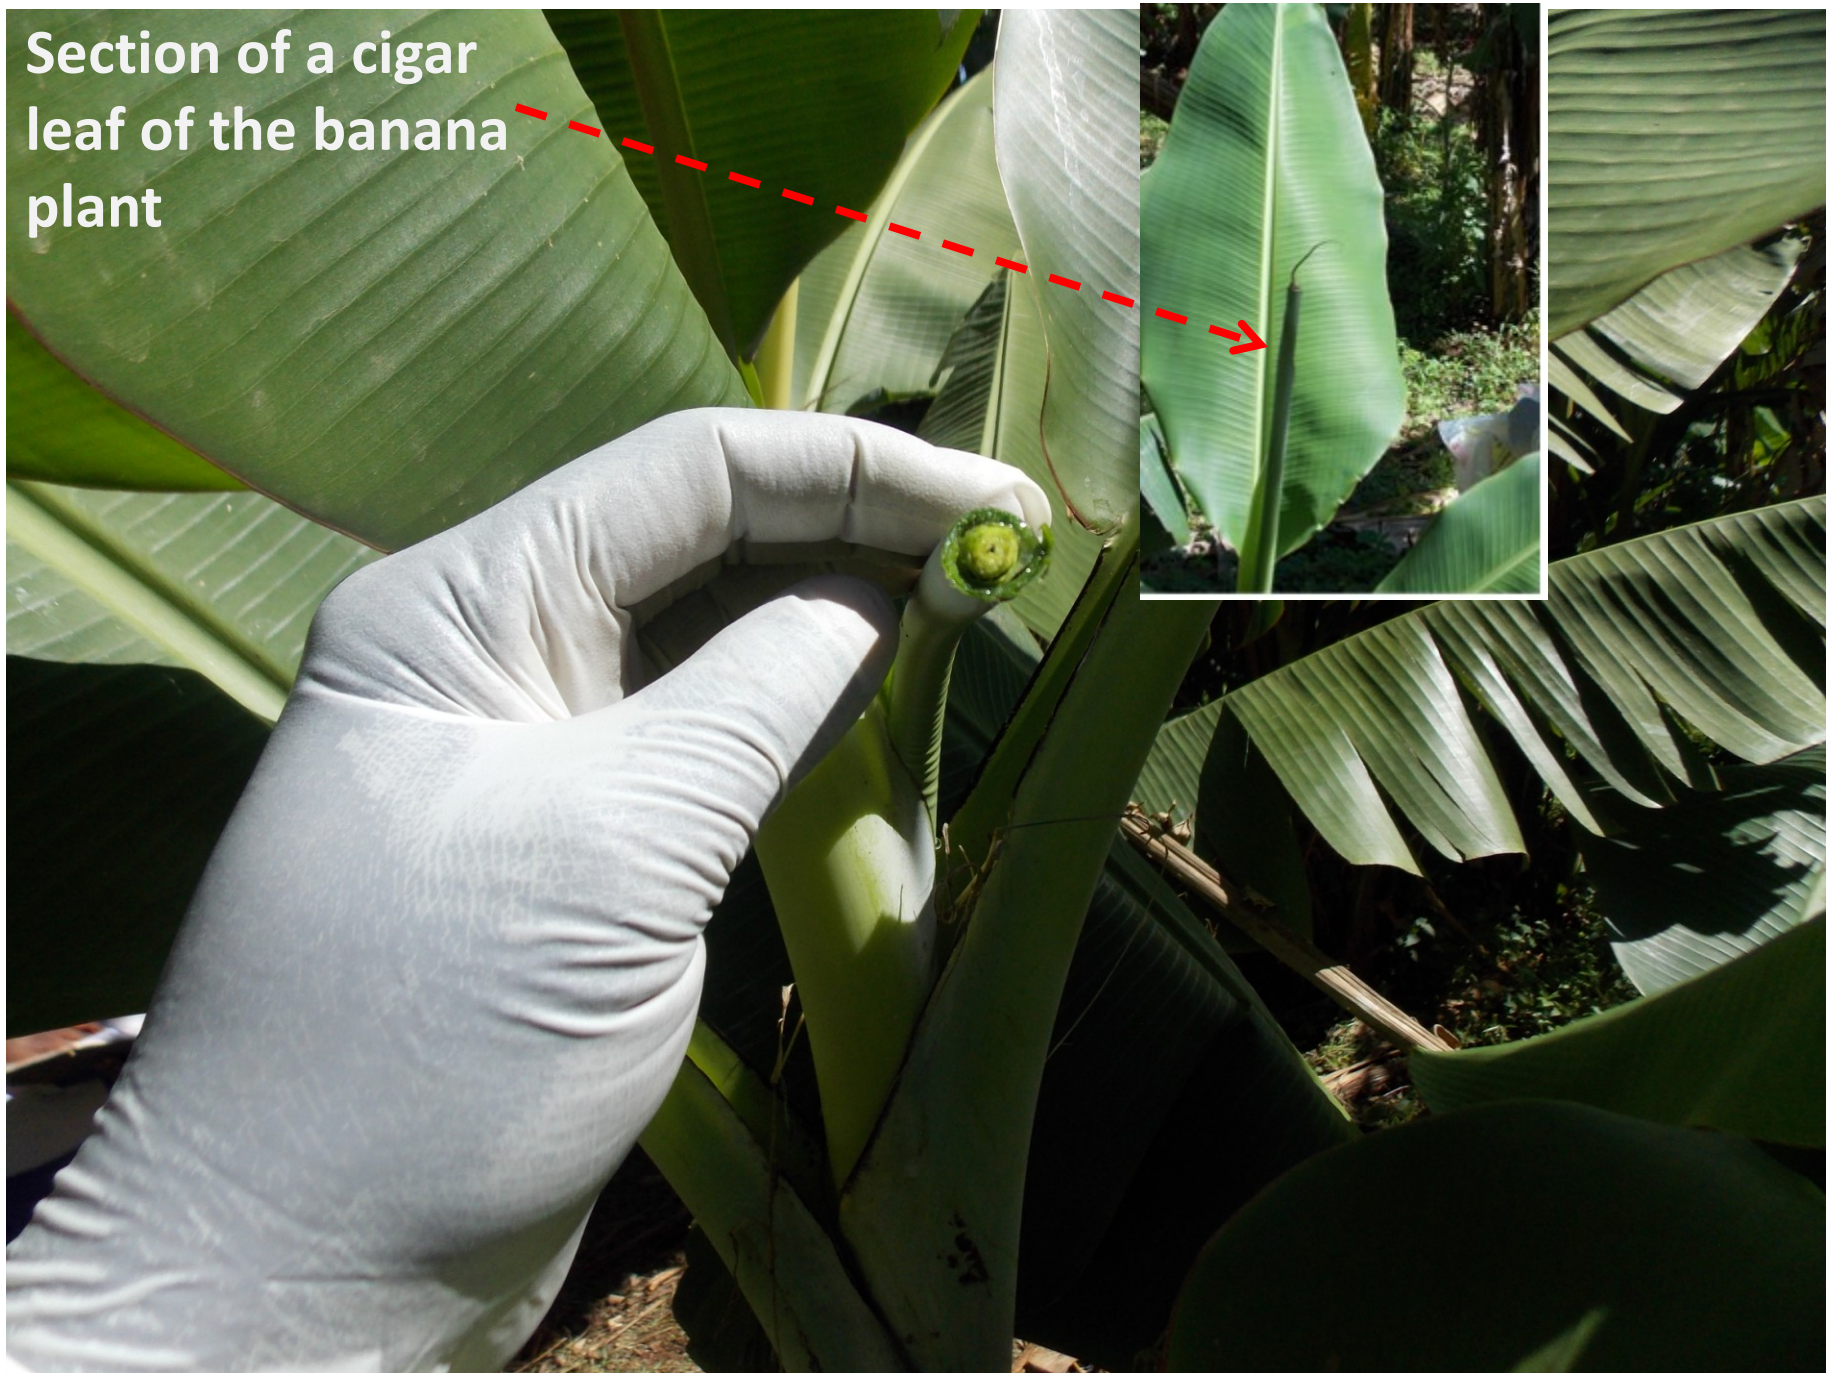

Supplement: 122_2020_3620_MOESM3_ESM.pdf [file 122_2020_3620_MOESM3_ESM.pdf]
